# Supplementary material for: Targeted Mutation of Nuclear Bone Morphogenetic Protein 2 Impairs Secondary Immune Response in a Mouse Model
Source: Hindawi journal article supplement (doi:10.1155/2015/975789), 2015-01-01
Supplement: f1 [file 975789.f1.pdf]

A.

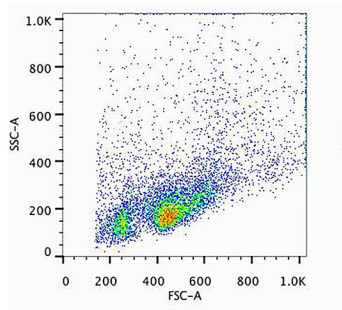

B.

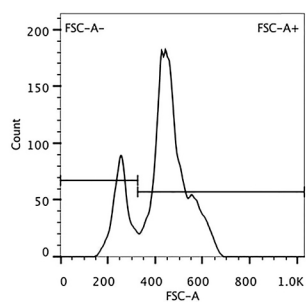

C.

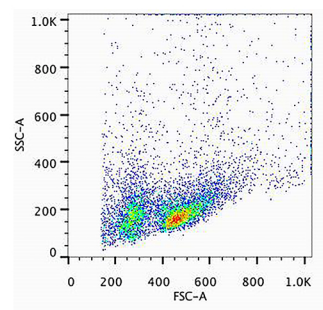

D.

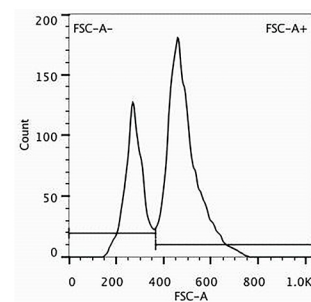

E. Uninfected

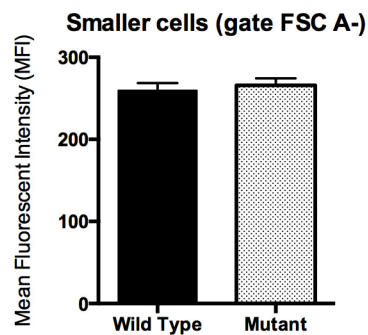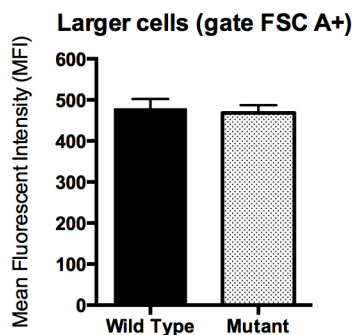

F. Day 8

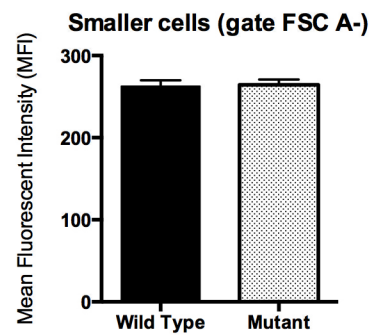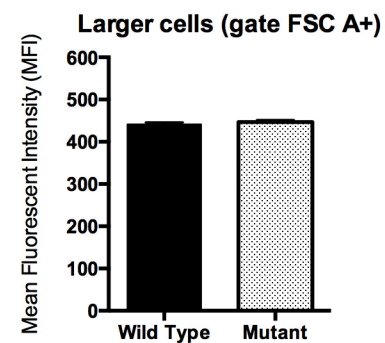

G. Day 38

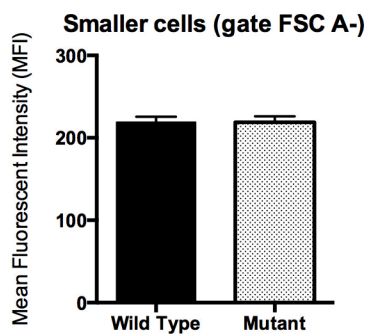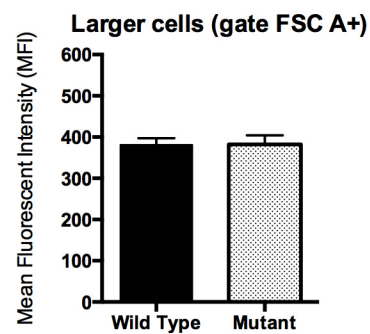

**Supplemental Figure 1. Splenic cell sizes in wild type and mutant mice are identical.** A) Forward scatter and side scatter plot for a representative uninfected (naïve) wild type spleen. B) Forward scatter histogram of the same representative naïve wild type spleen as in A, showing the two populations of gated cells (FSC A-, smaller cells; FSC-A+, larger cells). C) Forward scatter and side scatter plot of a representative naïve nBmp2NLS<sup>tm</sup> mutant spleen. D) Forward scatter histogram of the same representative naïve nBmp2NLS<sup>tm</sup> mutant spleen as in C, showing the two populations of gated cells (FSC A-, smaller cells; FSC-A+, larger cells). E) Mean fluorescent intensity for the two gates (FSC A- and A+) comparing the sizes of naïve wild type and mutant spleen cells (n=10). F) Mean fluorescent intensity for the two gates (FSC A- and A+) comparing the sizes of wild type and mutant spleen cells 8 days after primary infection (n=5). G) Mean fluorescent intensity for the two gates (FSC A- and A+) comparing the sizes of wild type and mutant spleen cells 3 days after secondary infection (and 38 days after primary infection) (n=10). Values shown are average  $\pm$  SE.
